# Supplementary material for: Precision delivery of RAS-inhibiting siRNA to KRAS driven cancer via peptide-based nanoparticles
Source: PubMed Central journal article supplement (PMC6677667; doi:10.18632/oncotarget.27109), 2019-07-30
Supplement: oncotarget-10-4761-s001.pdf [file oncotarget-10-4761-s001.pdf]

## Precision delivery of RAS-inhibiting siRNA to KRAS driven cancer via peptide-based nanoparticles

### SUPPLEMENTARY MATERIALS

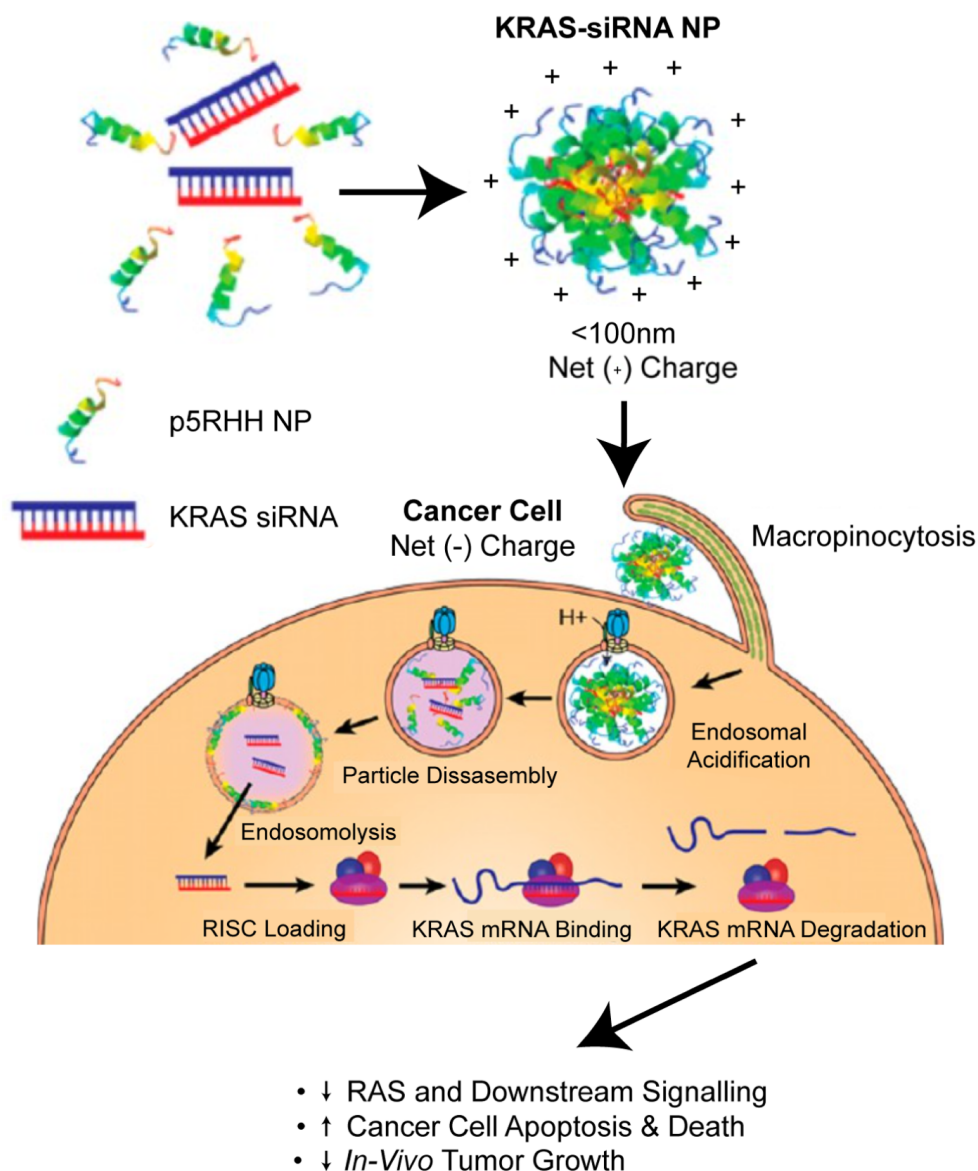

**Supplementary Figure 1.** p5RHH Anti-KRAS Nanoparticle Schematic. RISC= RNA induced silencing complex.

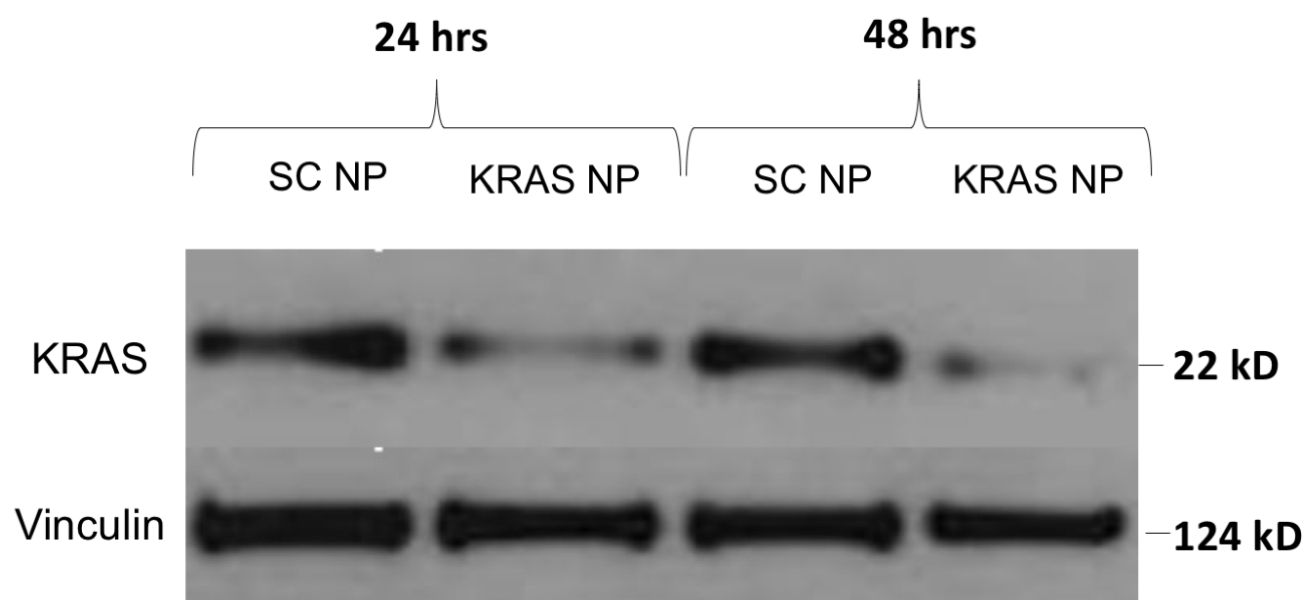

**Supplementary Figure 2: Western blot demonstrating sustained KRAS knockdown *in vitro*.** Western blot 24 and 48 hours after treatment of KPC-1 pancreatic cancer cells with KRAS-siRNA NP.

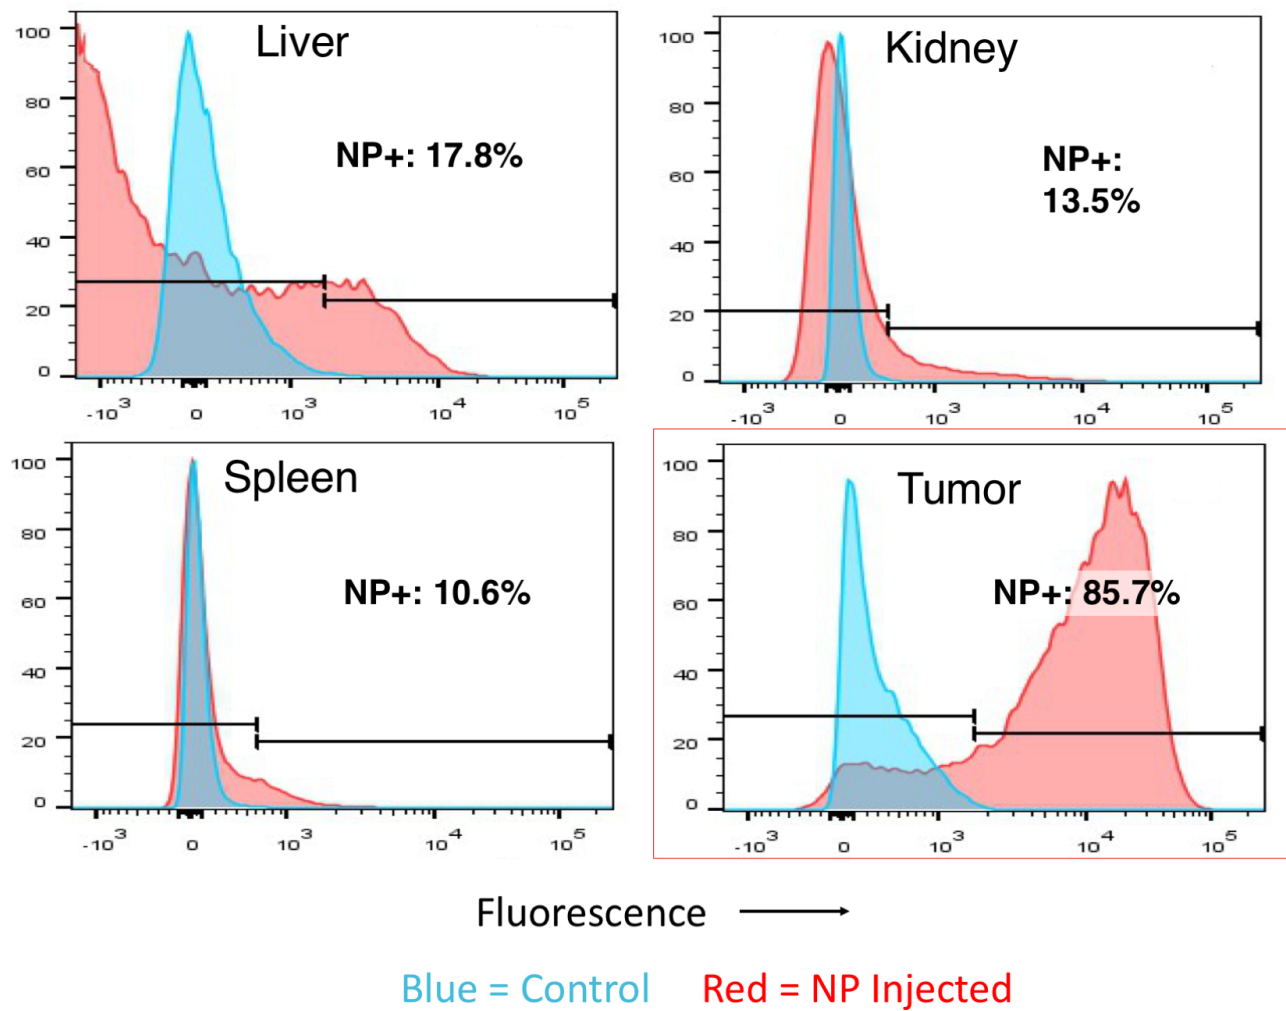

**Supplementary Figure 3: Representative flow cytometry plot of single cell suspensions derived from tumor and organs of tumor-bearing mice.** Flow cytometry plots after *in vivo* injection of fluorescent NP, showing avid uptake in tumor cells, but minimal uptake in other organs.

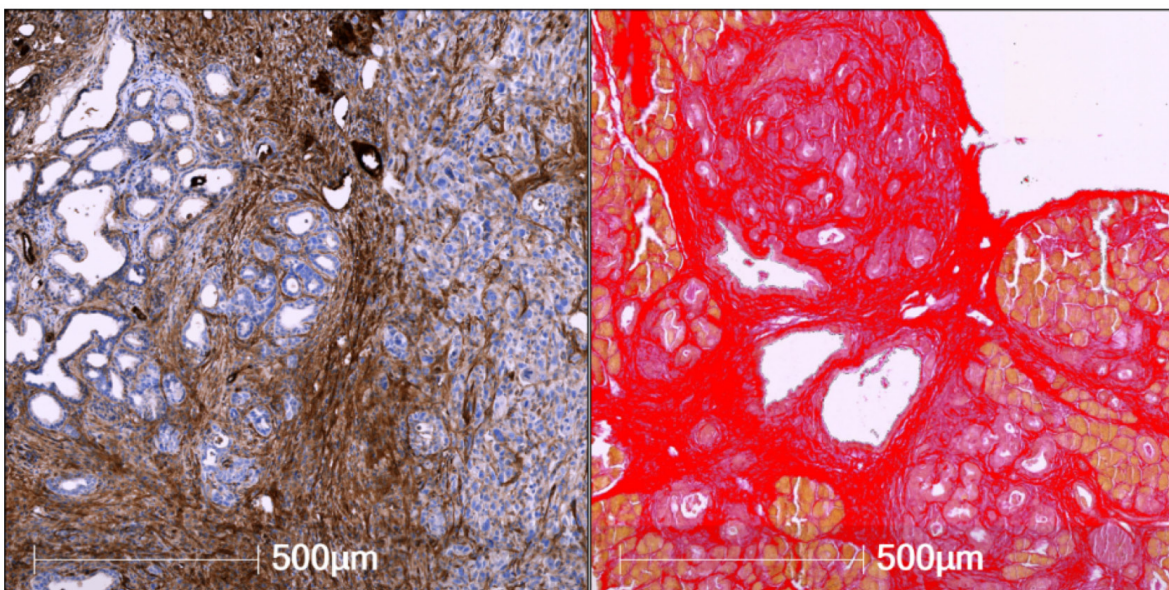

**Supplementary Figure 4: KPPC tumors demonstrate a dense stromal infiltrate.** Shown via SMA (left) and Sirius Red (right) staining.

## A Complete Blood Count (selected labs)

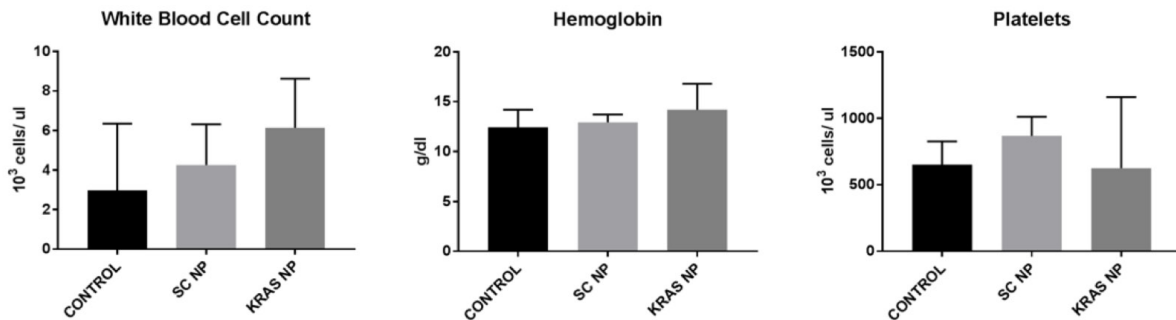

## B Liver Function Tests (selected labs)

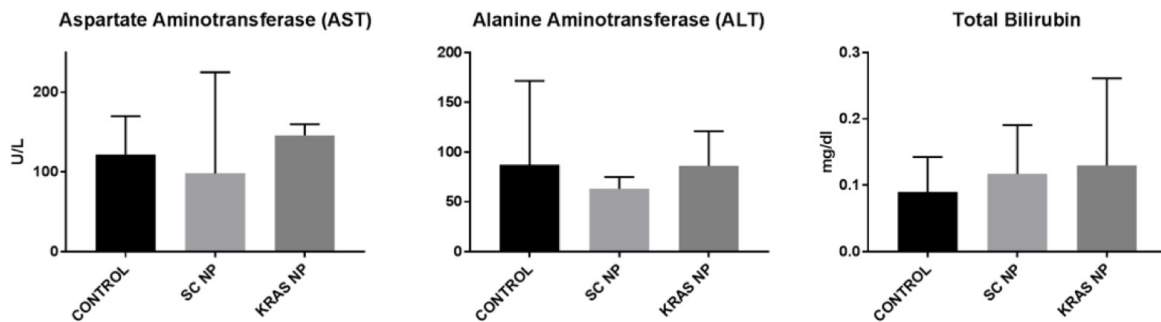

## C Renal Function Tests (selected labs)

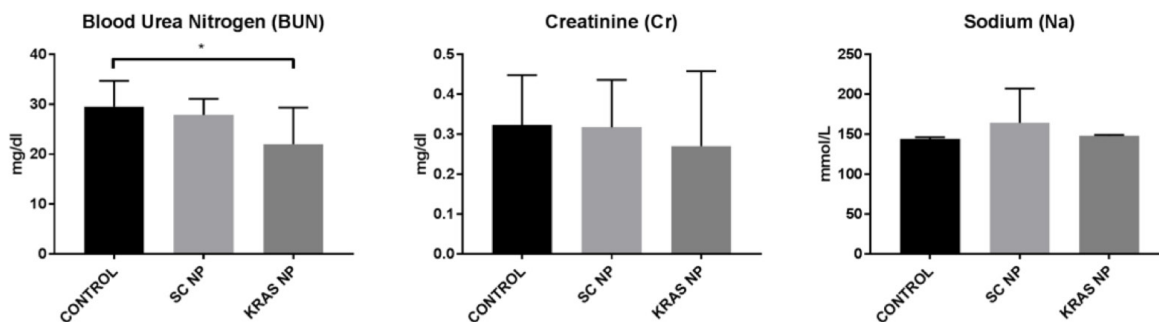

**Supplementary Figure 5: Peripheral blood tests results after *in vivo* nanoparticle treatment.** Results from C57BL/6J mice with ~0.5cm tumors, after 3 doses every 48 hours of control, SC-siRNA NP or KRAS-siRNA NP (N=5-8/group). Mice taken down ~6 hours after the final dose. (A) white blood cell (WBC), hemoglobin (Hb) and platelet counts from complete blood count. (B) Selected liver function test results: aspartate aminotransferase (AST), alanine aminotransferase (ALT) and total bilirubin. (C) Selected renal function test results: blood urea nitrogen (BUN), creatinine (Cr), and sodium (Na).  $*p < 0.05$ , 95% confidence intervals shown. Normal average lab values for similar aged female C57BL/6J mice (Jackson Laboratory data): WBC 3.48, Hb 17, platelets 1019, ALT 43, bilirubin 0.5, BUN 27, Cr 0.3, and Na 154.

## KRAS RNA Knockdown by siRNA

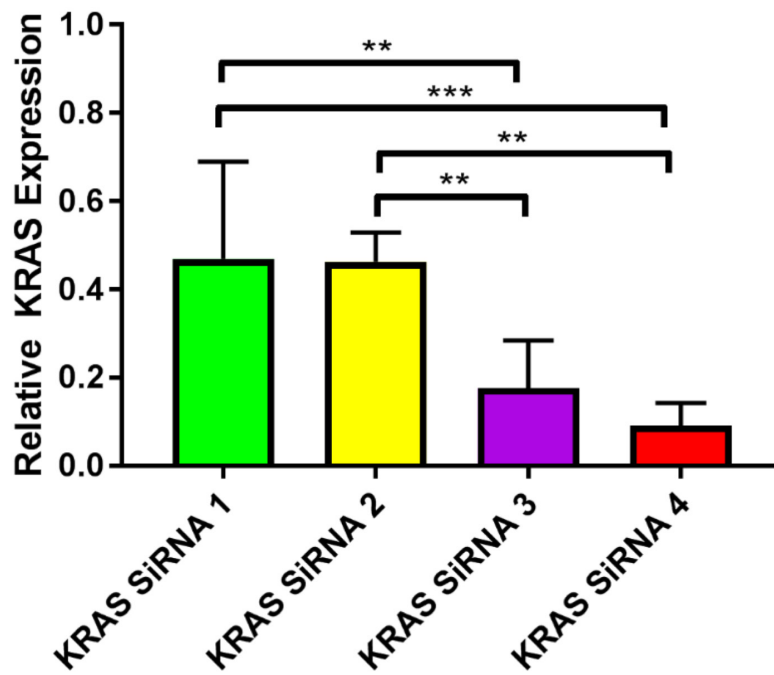

**Supplementary Figure 6.** RT-PCR results from an siRNA KRAS knockdown screen. Sequence 4, Sigma-Aldrich KRAS siRNA sequence GUGCAAUGAGGGACCAGUA (5'-3') was the most efficacious at KRAS knockdown *in vitro*.

**Supplementary Table 1: Breakdown of positive cells per each of the five 20× HPFs for the 7 mice in the Control (A), SC-siRNA NP (B) and KRAS-siRNA NP (C) groups**

| <b>A.</b>          |      |      |      |      |      |      |
|--------------------|------|------|------|------|------|------|
| <b>Control NP</b>  |      |      |      |      |      |      |
| 415                | 6    | 1083 | 995  | 2996 | 1419 | 2915 |
| 902                | 4    | 6    | 1485 | 2937 | 556  | 2826 |
| 8                  | 0    | 158  | 1049 | 2852 | 202  | 2880 |
| 0                  | 4    | 830  | 1863 | 2638 | 255  | 2890 |
| 26                 | 0    | 651  | 347  | 2640 | 1327 | 2952 |
| 270                | 3    | 546  | 1148 | 2813 | 752  | 2893 |
| <b>B.</b>          |      |      |      |      |      |      |
| <b>Scramble NP</b> |      |      |      |      |      |      |
| 42                 | 274  | 966  | 1456 | 856  | 131  | 281  |
| 2                  | 1131 | 786  | 493  | 772  | 10   | 429  |
| 6                  | 38   | 816  | 64   | 1200 | 51   | 133  |
| 26                 | 36   | 1076 | 307  | 3    | 316  | 76   |
| 128                | 5    | 554  | 674  | 81   | 149  | 0    |
| 27                 | 297  | 840  | 588  | 582  | 131  | 184  |
| <b>C.</b>          |      |      |      |      |      |      |
| <b>KRAS NP</b>     |      |      |      |      |      |      |
| 51                 | 1    | 26   | 11   | 100  | 44   | 439  |
| 40                 | 2    | 74   | 0    | 213  | 7    | 349  |
| 30                 | 9    | 61   | 84   | 473  | 5    | 145  |
| 8                  | 6    | 8    | 0    | 78   | 26   | 341  |
| 14                 | 6    | 18   | 1    | 249  | 128  | 158  |
| 29                 | 5    | 37   | 19   | 222  | 42   | 304  |

Each column represents a unique mouse, and each row represents one 20x HPF. Bottom row represents average number of cells positive per HPF for a given mouse.
